# Supplementary material
Source: PubMed Central journal article supplement (PMC6385751)
Supplement: DB180416SupplementaryData.pdf [file DB180416SupplementaryData.pdf]

SUPPLEMENTARY DATA

**Supplementary Figure S1. Muscle-specific deletion of FoxOs mitigates weight loss, but does not prevent loss of cardiac/adipose tissue mass or alter myogenic factors in muscle in response to insulin-deficient diabetes.** Western blot analysis for FoxO isoform expression in heart (A) and liver (B) from control and M-FoxO-TKO mice rendered diabetic with STZ. Body weight at sacrifice (C) in control, STZ-Diabetes, M-FoxO-TKO and STZ-FoxO-TKO mice (n=10-12). Heart weight (D), adipose and liver weights (E) after 12-15 days of diabetes after STZ treatment (n=10-12). mRNA levels of myogenic factors in quadriceps muscle (F) (n=4-6). (\*-p<0.05, \*\*-p<0.01 vs. control, †-p<0.05, STZ-Diabetes vs. STZ-FoxO-TKO, #-p<0.05, ##-p<0.01 as indicated, ◇-p<0.05 genotype main effect, ^-p<0.05 STZ main effect, Two-way ANOVA). sWAT – subcutaneous white adipose tissue (WAT), eWAT – epididymal WAT.

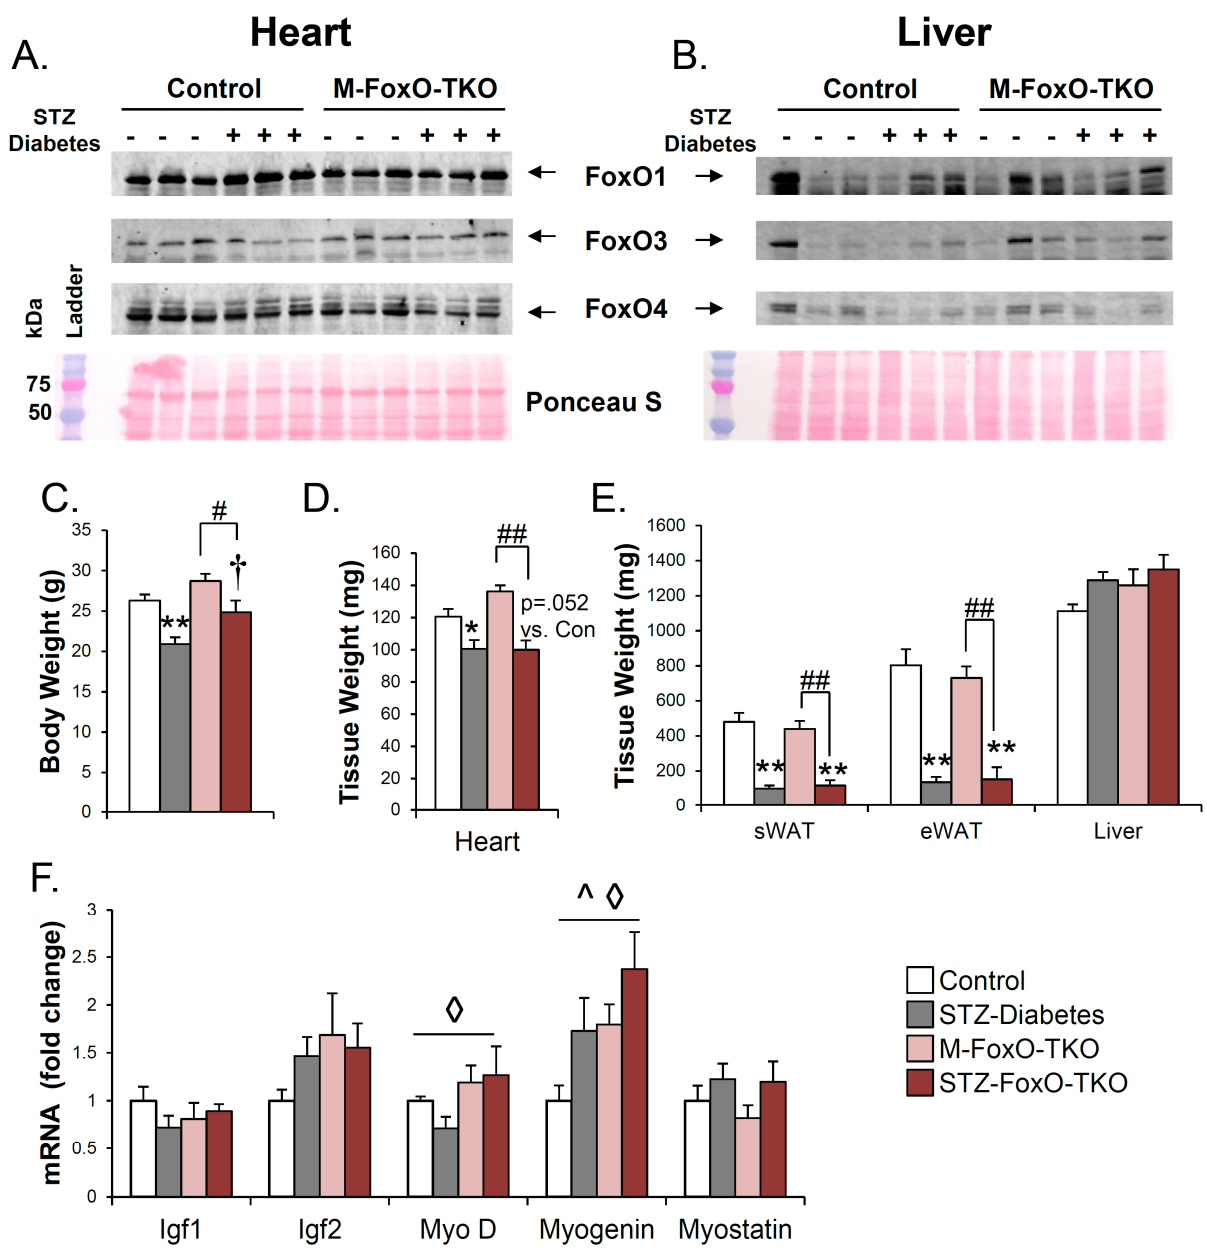

SUPPLEMENTARY DATA

**Supplementary Figure S2. FoxO Deletion prevents upregulation of autophagy markers in skeletal muscle.** Quantification of total LC3A vesicles per fiber (A) and fiber cross-sectional area (B) from TA images in Figure 3A (n=5-6). Western blot analysis (C) and densitometry (D) of autophagy markers in Quad from STZ-Diabetes and STZ-FoxO-TKO mice treated with Saline or Colchicine for 2 days prior to sacrifice (n=7 per group). Western blot analysis and densitometric ratio of LC3-II/LC3-I in heart (E) and liver (F) from control, STZ-Diabetes, M-FoxO-TKO and STZ-FoxO-TKO mice. (\*-p<0.05, \*\*-p<0.01 vs. control, †-p<0.05, ††-p<0.01, STZ-Diabetes vs. STZ-FoxO-TKO, ^^-p<0.01 STZ main effect, Two-way ANOVA)

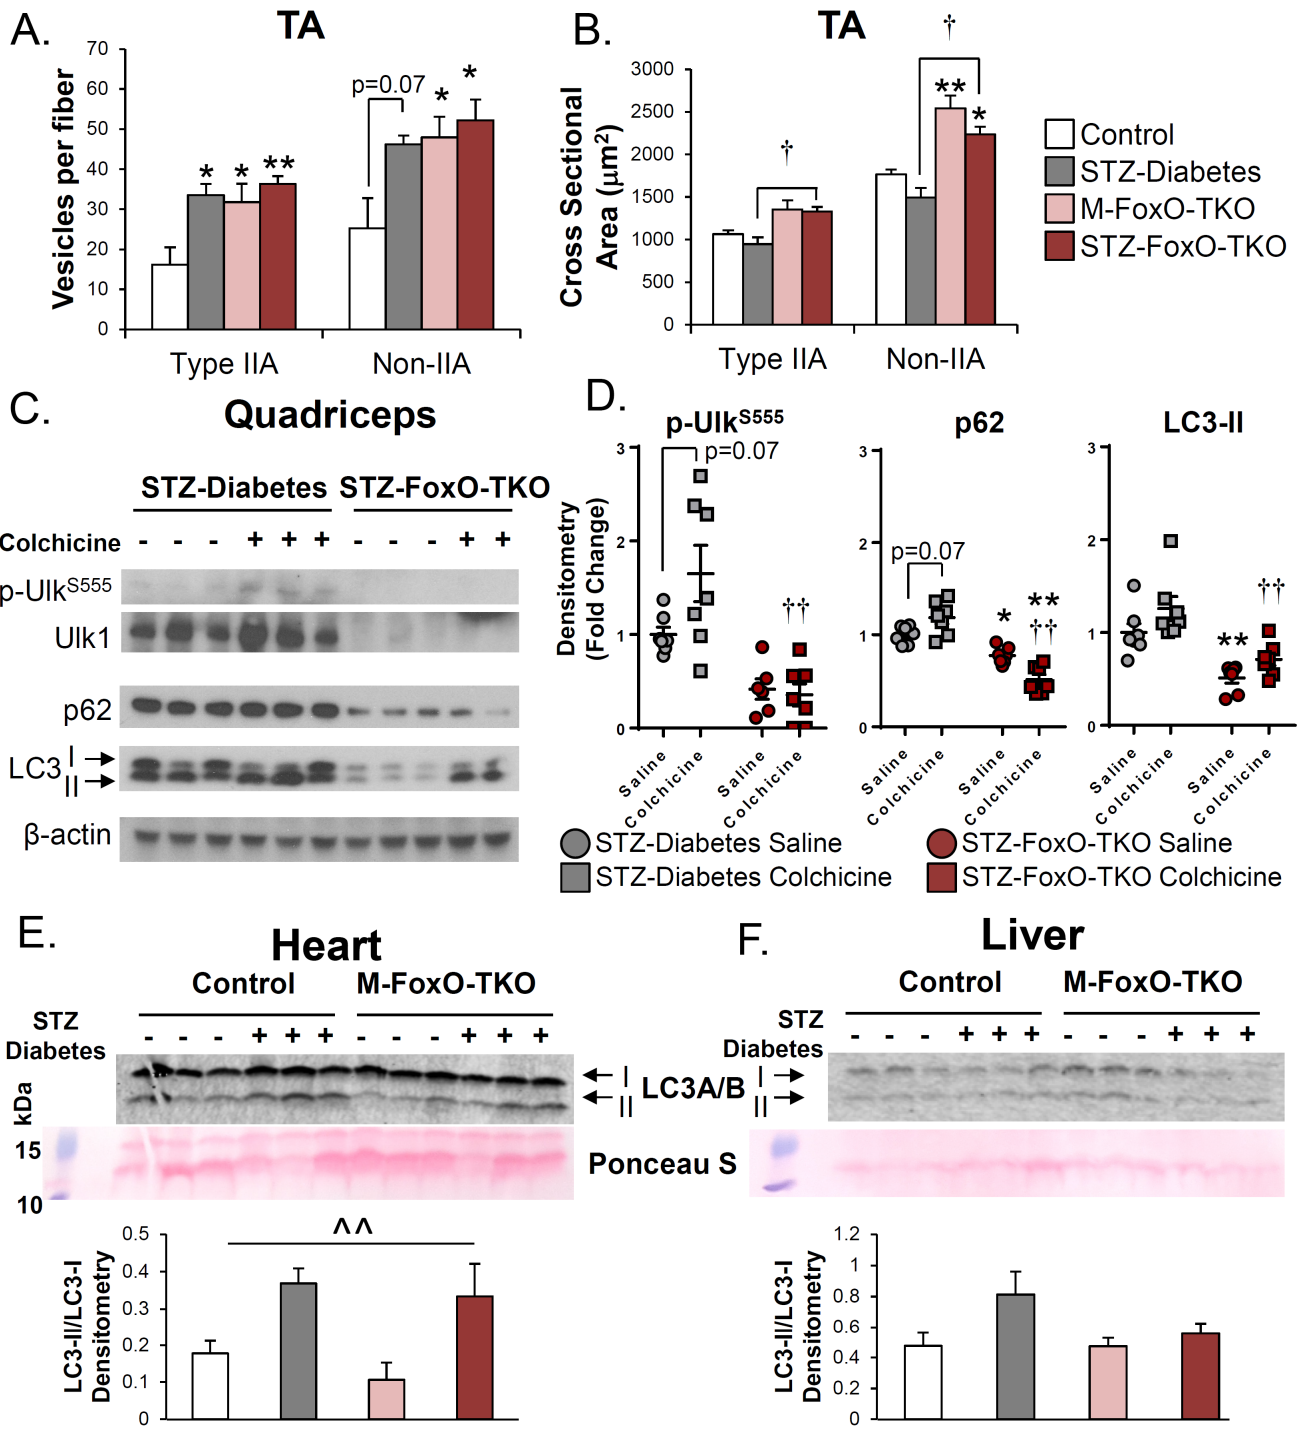

SUPPLEMENTARY DATA

**Supplementary Figure S3. Muscle Specific FoxO Deletion reduces proteolysis in Soleus muscle, but proteasome activity is unchanged and a 19S proteasome subunit is increased in Quad.** Proteasome activity (A) and western of a 19S proteasomal subunit (B) in Quadriceps muscle. Proteolysis measured by tyrosine release in ex vivo EDL (C) and Soleus (D) muscle (n=4-5). (\*-p<0.05, \*\*-p<0.01 vs. control, †-p<0.05, ††-p<0.01, STZ-Diabetes vs. STZ-FoxO-TKO, Two-way ANOVA)

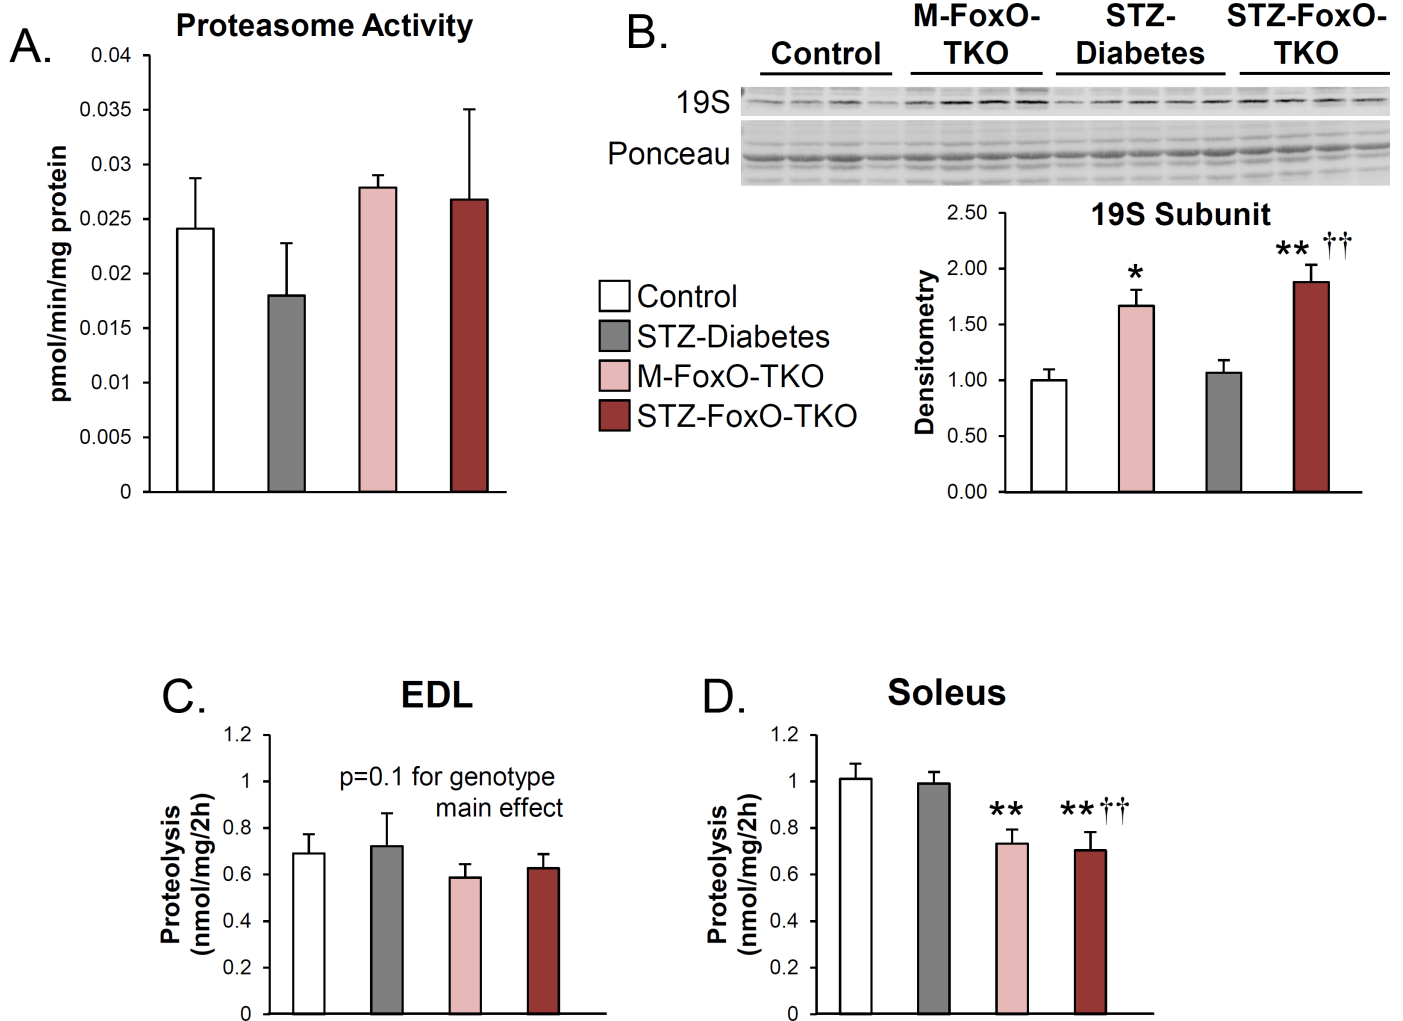

SUPPLEMENTARY DATA

**Supplementary Figure S4. Despite regulation of 4EBP1, FoxO Deletion does not restore the suppressed protein synthesis in STZ-Diabetes, and upregulation of autophagy markers by STZ-Diabetes is muscle-type specific.** Western blot (A) and densitometry (B) of phospho- and total 4EBP1 protein in Quad. Protein synthesis by SUNSET method (C) and densitometry (D) in Quad (n=2-6 per group, Fed and Fasted mice treated +/- puromycin were used as positive and negative controls; ND=not diabetic and therefore excluded). qRT-PCR of autophagy/lysosomal genes and E3-ubiquitin ligases in EDL (E) and Soleus (F) from control, STZ-Diabetes, M-FoxO-TKO, and STZ-FoxO-TKO mice. (n=5-6 per group. \*-p<0.05, \*\*-p<0.01 vs. control, †-p<0.05, ††-p<0.01, STZ-Diabetes vs. STZ-FoxO-TKO, ^-p<0.05, ^^-p<0.01 STZ main effect, Two-way ANOVA)

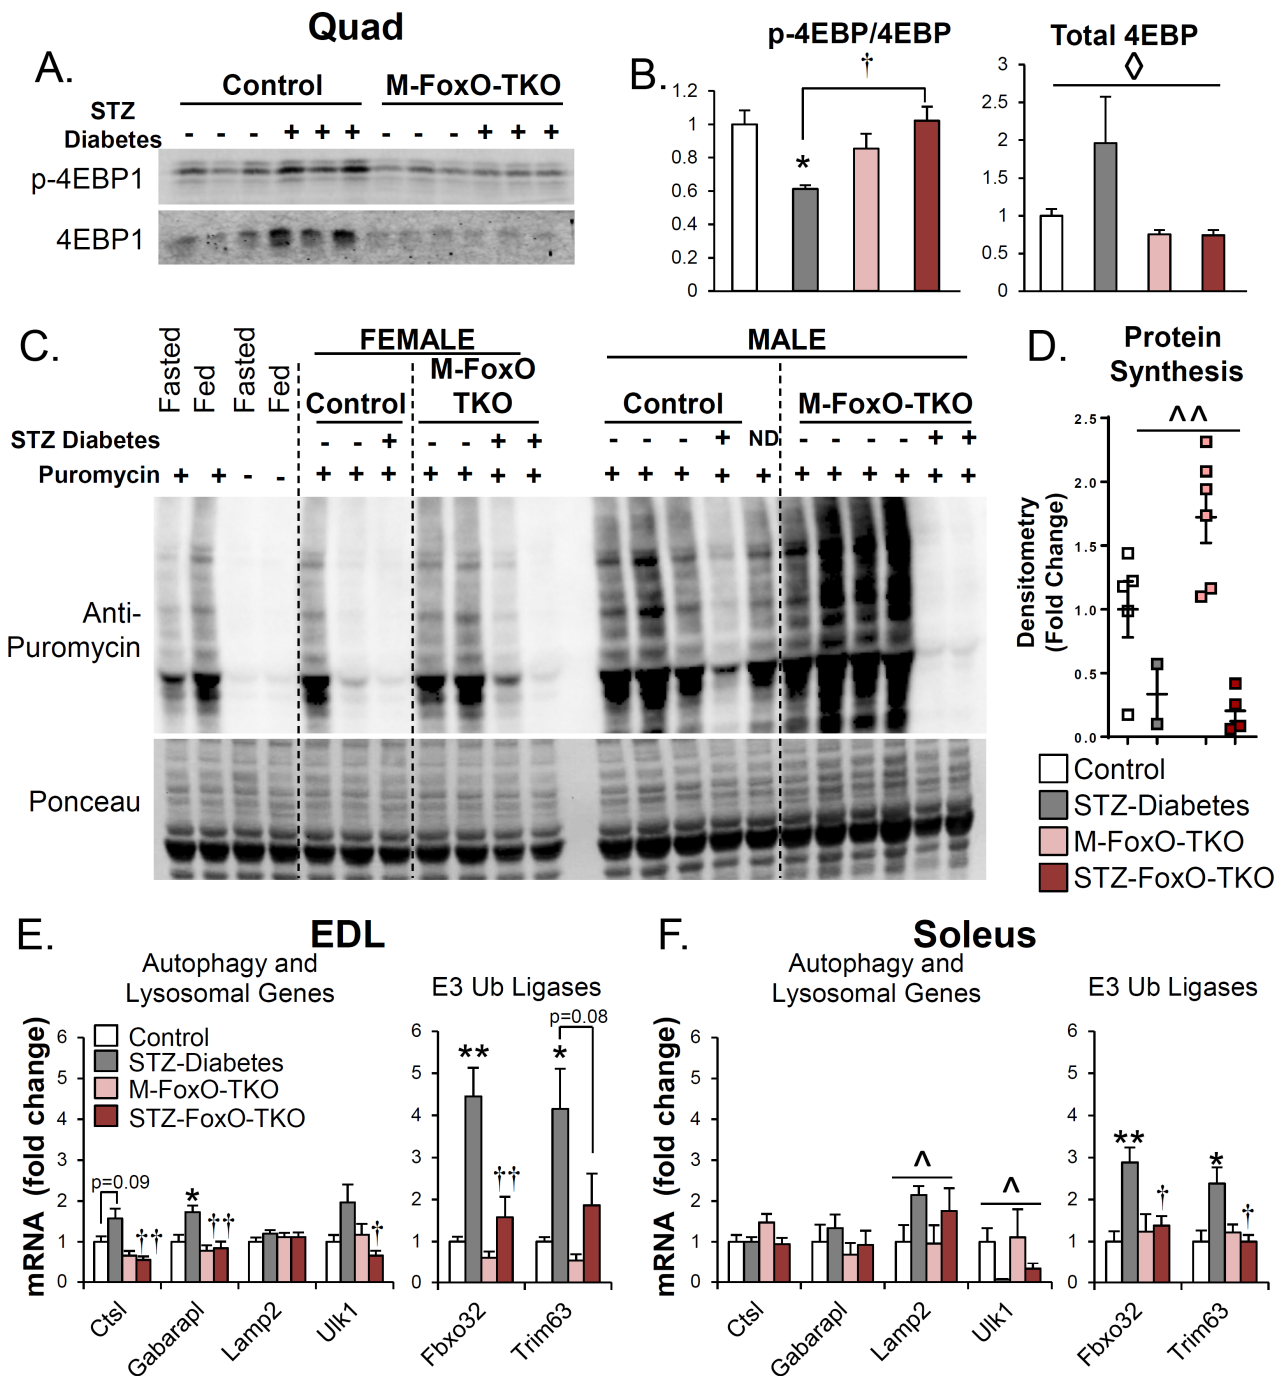



SUPPLEMENTARY DATA

**Supplementary Figure S5. A majority of the changes in transcript levels in response to STZ-Diabetes are normalized by deletion of FoxOs in muscle.** Volcano plots of transcripts comparing STZ-Diabetes to Controls (A) and STZ-FoxO-TKO to M-FoxO-TKO (B) from quadriceps and gastrocnemius muscles determined by RNA-Seq (n=4-6 per group). Red shaded boxes indicate transcripts that are increased or decreased by more than 2 fold with a p-value less than 0.001. Red numbers indicate the total number of downregulated transcripts while green numbers indicate upregulated transcripts.

**A.**  
**STZ-Diabetes**  
**vs. Control**

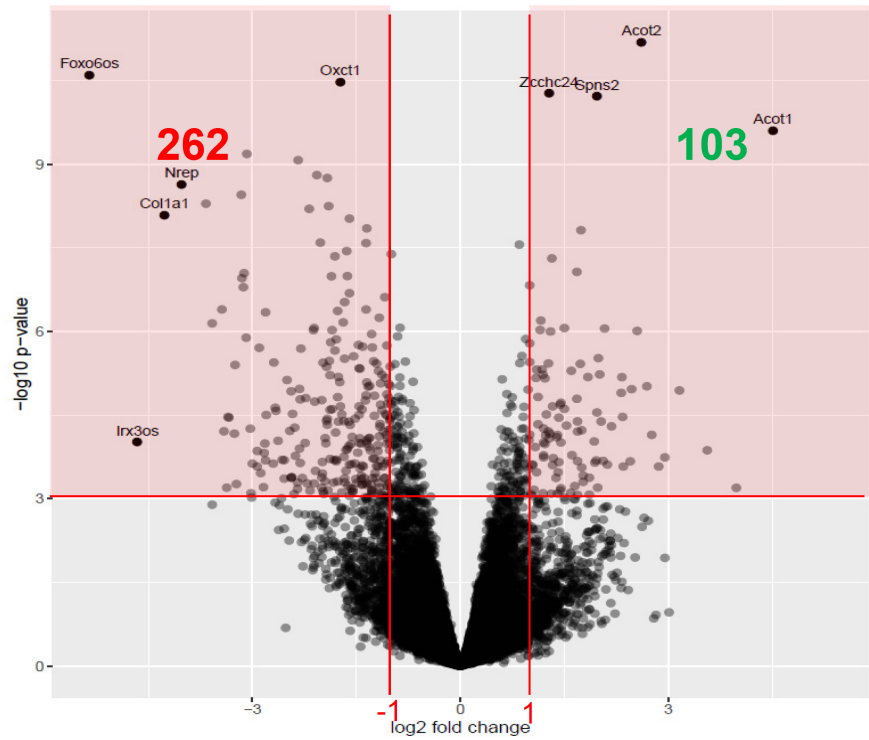

Transcripts with 2-fold  
change and  $p < 0.001$

**Down**

**Up**

**B.**  
**STZ-FoxO-TKO vs.**  
**M-FoxO-TKO**

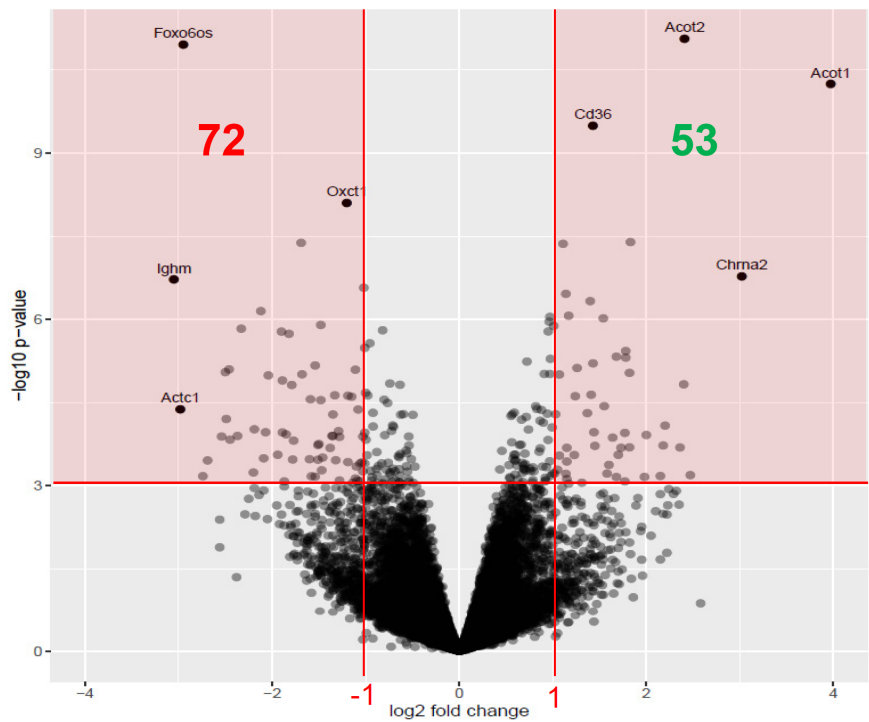



SUPPLEMENTARY DATA

**Supplementary Figure S7. A subset of transcripts in the Biosynthesis of Unsaturated Fatty Acids, Fatty Acid Metabolism and PPAR Signaling pathways is increased by diabetes independent of FoxOs.** Heat map of all genes from the “Biosynthesis of Unsaturated Fatty Acids”, “Fatty Acid Metabolism”, and “PPAR Signaling” KEGG pathways from Figure 5E with cluster analysis based on Z-score.

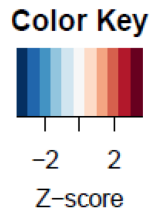

**Heat map of All Genes from KEGG Pathways “Biosynthesis of Unsaturated Fatty Acids”, “Fatty Acid Metabolism”, and “PPAR Signaling Pathway”**

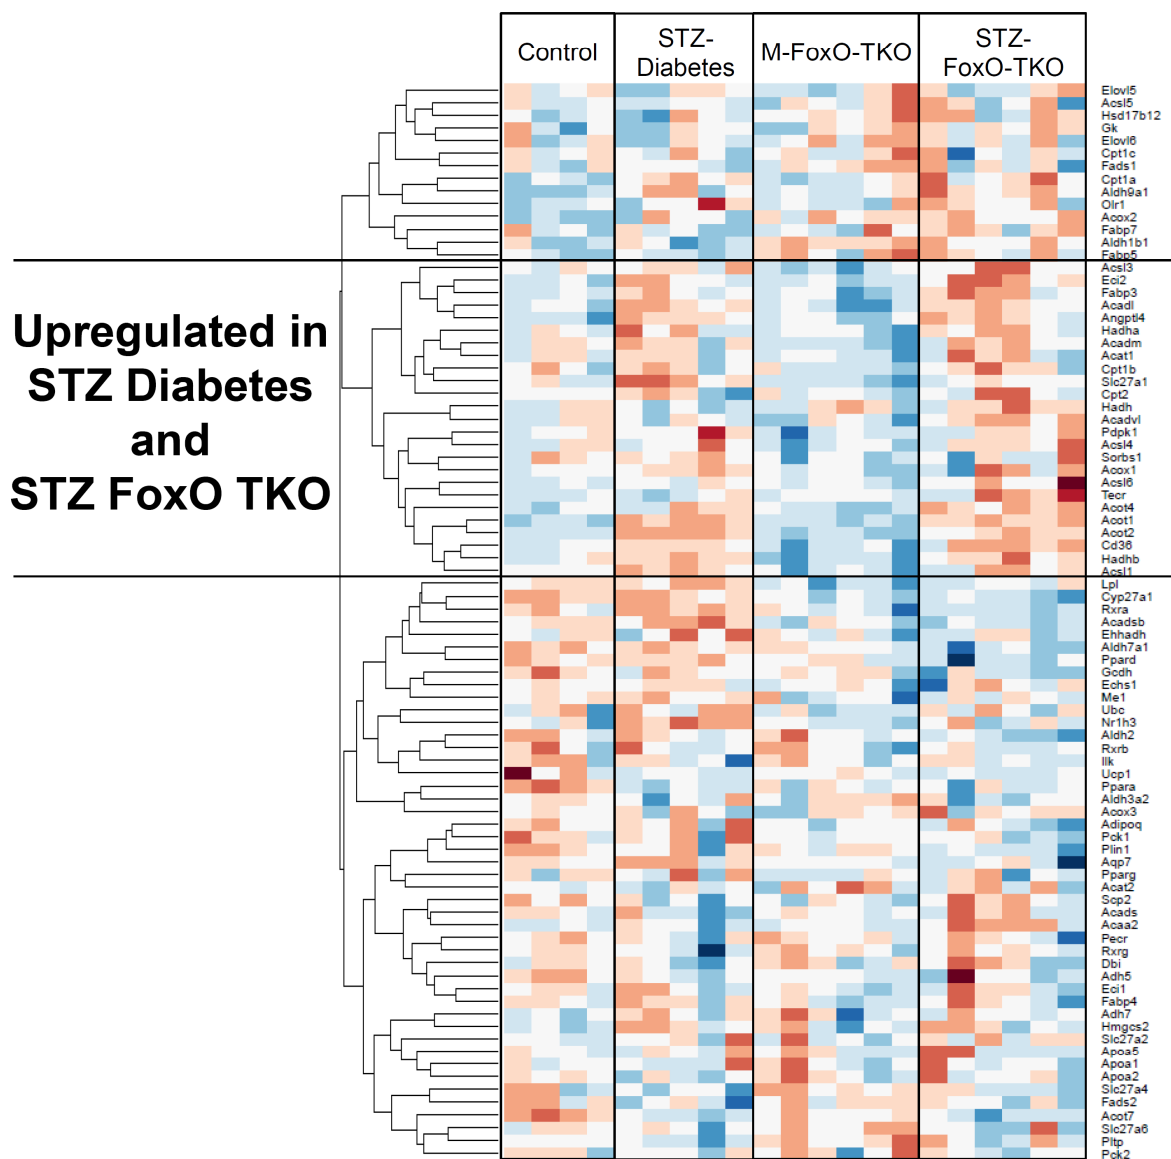

SUPPLEMENTARY DATA

Supplementary Table S1. Primers for QPCR of Mouse genes.

| Common name               | Gene name        | 5' primer                  | 3' primer                  |
|---------------------------|------------------|----------------------------|----------------------------|
| <b>Mouse QPCR Primers</b> |                  |                            |                            |
| FoxO1                     | <i>Foxo1</i>     | TGCTGTGAAGGGACAGATTG       | GAGTGGATGGTGAAGAGCGT       |
| FoxO3                     | <i>Foxo3</i>     | ACAAACGGCTCACTTTGTCCCAGA   | TCTTGCCCGTGCCTTCATTCT      |
| FoxO4                     | <i>Foxo4</i>     | GGTGCCCTACTTCAAGGACA       | AGCTTGCTGCTGCTATCCAT       |
| IGF-1                     | <i>Igf1</i>      | GACCGAGGGGCTTTTACTTC       | GGGGCACAGTACATCTCCA        |
| IGF-2                     | <i>Igf2</i>      | GGACCGCGGCTTCTACTT         | ACGTCCCTCTCGGACTTG         |
| MyoD                      | <i>Myod1</i>     | AGCACTACAGTGGCGACTCAGAT    | TCCACTATGCTGGACAGGCAGT     |
| Myogenin                  | <i>Myog</i>      | TTGCTCAGCTCCCTCAACCAGGA    | AGATTGTGGGCGTCTGTAGGGTCA   |
| Myostatin                 | <i>Mstn</i>      | TGGCTCAAACAGCCTGAATCCAAC   | TGGGTGTGTCTGTACCTTGACTT    |
| Psme4                     | <i>Psme4</i>     | AATTTTCTCCATAAAGTCGGA      | CAGATCAAGAGCAACCTGGG       |
| Ube4a                     | <i>Ube4a</i>     | GTTTGCAGCAATCCAGAAAGAG     | CAGGCTCTCTGACACACTATTATC   |
| Ubeq2q                    | <i>Ubeq2q</i>    | GAATCGCTCGTGGTTCTTGT       | GCTGGAGATGAGGGGAAGA        |
| Itch                      | <i>Itch</i>      | CCA CCC ACC CCA CGA AGA CC | CTA GGG CCC GAG CCT CCA GA |
| Psmb3                     | <i>Psmb3</i>     | GAGCAAATGAAGGGCTTGAA       | GGCCAACCTCCTGTATGAGA       |
| Psm8                      | <i>Psm8</i>      | GGCTGACTCAGGAAGCTGTT       | CCTGTGCAAAGACATTCCCT       |
| Psm11                     | <i>Psm11</i>     | CTAGATATGGAAGCAGCCACAG     | CCAATGCTTGGCGTAAGAAAG      |
| CD36                      | <i>Cd36</i>      | CCTGCAAATGTCAGAGGAAA       | GCGACATGATTAATGGCACA       |
| FATP1                     | <i>Slc27a1</i>   | AGCCGAACACGAATCAGAAC       | TTCTGTGTGTACGTGGGTGG       |
| Acs1                      | <i>Acs1</i>      | ACCATCAGTGGTACCCGCTA       | CGCTCACCACCTTCTGGTAT       |
| Acot1                     | <i>Acot1</i>     | CCCCTGTGACTATCCTGAGAA      | CAAACACTCACTACCCAATGT      |
| Acot2                     | <i>Acot2</i>     | ATGGTGGCCTCGTCTTTTCG       | GAGCGGCGGAGGTACAAAC        |
| p27 Kip1                  | <i>Cdkn1b</i>    | GGGGAACCGTCTGAAACATT       | AGTGTCCAGGGATGAGGAAG       |
| Gadd45a                   | <i>Gadd45a</i>   | GGATCCTTCCATTGTGATGAA      | TGCTACTGGAGAACGACGC        |
| 4E-BP                     | <i>Eif4ebp1</i>  | CCT CCT TGT GCC TGT GTC TA | GCC TAA GGA AAG ATG GGT GT |
| Cathepsin L               | <i>Ctsl</i>      | TATCCCTCAGCAAGAGAAAGCCCT   | TCCTTCATAGCCATAGCCCACCAA   |
| LC3A                      | <i>Map1lc3a</i>  | TCTGGTCCCAGACCATGTTA       | GGTTGACCAGCAGGAAGAAG       |
| LC3B                      | <i>Map1lc3b</i>  | CACTGCTCTGTCTTGTGTAGGTTG   | TCGTTGTGCCTTTATTAGTGCATC   |
| Lamp2a                    | <i>Lamp2</i>     | ACAACCTGACTCCTGTCGTTTCA    | AGTTGGAGTTGGAGTGGGTGTTGA   |
| Gabarapl                  | <i>Gabarapl1</i> | GTCATCGTGGAGAAGGCTCCTAAA   | GGAGGGATGGTGTGTTGACAAAG    |
| Bnip3                     | <i>Bnip3</i>     | CCCAGACACCACAAGATACCAACA   | GGTGGACTTGACCAATCCCATATCC  |
| Bnip3L                    | <i>Bnip3l</i>    | CACCACAAGAAGATGGGCAGATCA   | TGGACCAGTCTGATACCCAGT      |
| SMART                     | <i>Fbxo21</i>    | TCA ATA ACC TCA AGG CGT TC | GTT TTG CAC ACA AGC TCC A  |
| MUSA1                     | <i>Fbxo30</i>    | TCG TGG AAT GGT AAT CTT GC | CCT CCC GTT TCT CTA TCA CG |
| Atrogin-1                 | <i>Fbxo32</i>    | CTGTGCTGGTGGGCAACATTAACA   | CGTCACTCAGCCTCTGCATGAT     |
| MuRF-1                    | <i>Trim63</i>    | ATGAAGTGATCATGGACCGGCA     | TTGCACAAGGAGCAAGTAGGCA     |
| Ulk1                      | <i>Ulk1</i>      | TGCAAATGGTACAATCAGCTGCC    | AGCAGGGCTTTGTGATATCTCGGT   |
| TBP                       | <i>Tbp</i>       | ACCCTTCACCAATGACTCCTATG    | TGACTGCAGCAAATCGCTTGG      |
| GAPDH                     | <i>Gapdh</i>     | TGTCGTGGAGTCTACTGGTGTCTT   | TCTCGTGGTTCACACCCATCACAA   |

SUPPLEMENTARY DATA

**Supplementary Table S2. Primers for QPCR of Human genes.**

| Common name               | Gene name        | 5' primer                    | 3' primer            |
|---------------------------|------------------|------------------------------|----------------------|
| <b>Human QPCR Primers</b> |                  |                              |                      |
| p27 Kip1                  | <i>CDKN1B</i>    | TTCATCAAGCAGTGATGTATCTG<br>A | AAGAAGCCTGGCCTCAGAAG |
| Gadd45b                   | <i>GADD45B</i>   | GGATGAGCGTGAAGTGGATT         | GTGTACGAGTCGGCCAAGTT |
| 4E-BP                     | <i>EIF4EBP1</i>  | AGTTCCGACACTCCATCAGG         | CGGGGACTACAGCACGAC   |
| Cathepsin L               | <i>CTSL</i>      | AAAGGCAGCAAGGATGAGTG         | GCGCGTGACTGGTTGAG    |
| LC3B                      | <i>MAP1LC3B</i>  | TTGTTTTATCCAGAACAGGAAGC      | CGGAGAAGACCTTCAAGCAG |
| LC3C                      | <i>MAP1LC3C</i>  | CCCAAGCGTCAGACCCTTC          | GGGGAACCTTGCCCGGATT  |
| Lamp2                     | <i>LAMP2</i>     | CAATGCATAAGACCGCACAG         | GGTGTTCAGCTGTTGTTGT  |
| Gabarapl                  | <i>GABARAPL1</i> | TGGCCAACAGTAAGGTCAGA         | TCGGAAAAAGGAAGGAGAAA |
| SMART                     | <i>FBXO21</i>    | TGCGTTTGGGATGTAGTGAG         | ATAACGTGCTGGTGGAGGAC |
| MUSA1                     | <i>FBXO30</i>    | TTCACACAATGGGAATGCTG         | GTCCAGGGCAGCTAGGG    |
| Atrogin-1                 | <i>FBXO32</i>    | ATGCCACTCAGGGATGTGA          | TTCTCAACTGCCATTCTGGA |
| MuRF-1                    | <i>TRIM63</i>    | CTTCGTGCTCCTTGACAT           | ATCGTCACGGAGTGTACGG  |
| Bnip3                     | <i>BNIP3</i>     | CTGTGCGTCCAGCAGTATTT         | GATGCAGGAGGAGAGCCTG  |
| Bnip3L                    | <i>BNIP3L</i>    | CGCACTTTTCTTCAAAGCCT         | GATGTGGAAATGCACACCAG |
| TBP                       | <i>TBP</i>       | GCCATAAGGCATCATTGGAC         | AACAACAGCCTGCCACCTTA |

## SUPPLEMENTARY DATA

Supplementary Table S3. Antibodies used.

| Protein                                | Vendor                  | Catalog number | Dilution |
|----------------------------------------|-------------------------|----------------|----------|
| <b>Immunofluorescence Antibodies</b>   |                         |                |          |
| LC3A                                   | Cell Signaling          | 4599           | 1:200    |
| Laminin                                | Sigma                   | L9393          | 1:200    |
| Myosin IIa                             | DSHB University of Iowa | SC-71          | 1:200    |
| Alexa-Fluor-594 Goat anti mouse        | Life Technologies       | #A-11032       | 1:500    |
| Alexa-Fluor-488 Goat anti rabbit       | Life Technologies       | #A-11008       | 1:500    |
| <b>Western Blot Antibodies</b>         |                         |                |          |
| FoxO1                                  | Cell Signaling          | 2880           | 1:1000   |
| FoxO3                                  | Cell Signaling          | 12829          | 1:1000   |
| FoxO4                                  | Abcam                   | 128908         | 1:1000   |
| $\beta$ -Actin                         | Cell Signaling          | 4970           | 1:1000   |
| GAPDH                                  | Cell Signaling          | 5174           | 1:1000   |
| LC3A/B                                 | Cell Signaling          | 12741          | 1:1000   |
| p62/SQSTM1                             | Cell Signaling          | 5114           | 1:500    |
| p-ULK <sup>S555</sup>                  | Cell Signaling          | 5869           | 1:1000   |
| ULK1                                   | Cell Signaling          | 8054           | 1:500    |
| Ubiquitin                              | Cell Signaling          | 3933           | 1:1000   |
| 19S Proteasome Subunit                 | Enzo Life Sciences      | BML-PW8870     | 1:1000   |
| p-4EBP1                                | Cell Signaling          | 9451           | 1:1000   |
| 4EBP1                                  | Cell Signaling          | 9452           | 1:1000   |
| Anti-Puromycin Sera (non-concentrated) | DSHB University of Iowa | PMY-2A4-S      | 1:20     |
| Secondary for Puromycin                | Jackson ImmunoResearch  | 115-035-208    | 1:10,000 |
| Rabbit secondary antibody              | Thermo Fisher           | SA5-35571      | 1:10,000 |
| Mouse secondary antibody               | Thermo Fisher           | SA5-35521      | 1:10,000 |
